# Supplementary material for: N -acetyl-cysteine as adjuvant therapy in female infertility: a systematic review and meta-analysis
Source: publisher site journal article supplement (doi:10.1515/jbcpp-2020-0107), 2020-11-19
Supplement: Supplementary file 1 [file j_jbcpp-2020-0107_suppl.docx]

**Figure 8: Sensitivity analysis**


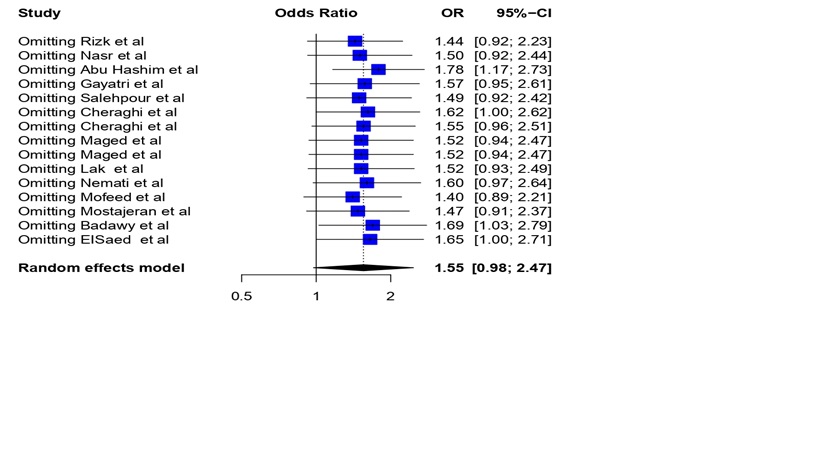


**Search Strategy**

**Pubmed: 223 Hits**

(((((((((((((((((((((((((((IVF) OR IVF[Title/Abstract])) OR ((ICSI) OR ICSI[Title/Abstract])) OR (((in-vitro fertilisation) OR in-vitro fertilisation[Title/Abstract]) OR in-vitro fertilisation[MeSH Terms])) OR ((in-vitro fertilisation procedure) OR in-vitro fertilisation procedure[Title/Abstract])) OR ((in vitro fertilization) AND in vitro fertilization[Title/Abstract])) OR ((intracytoplasmic sperm injection) OR intracytoplasmic sperm injection[Title/Abstract])) OR ((intracytoplasmic morphologically selected sperm injection) OR intracytoplasmic morphologically selected sperm injection[Title/Abstract])) OR ((superovulation) OR superovulation[Title/Abstract])) OR ((superovulation induction) OR superovulation induction[Title/Abstract])) OR ((insemination, intrauterine) OR insemination, intrauterine[Title/Abstract])) OR ((Intrauterine Insemination) OR Intrauterine Insemination[Title/Abstract])) OR (((ART) OR ART[Title/Abstract]) OR ART[MeSH Terms])) OR (((artificial insemination) OR artificial insemination[Title/Abstract]) OR artificial insemination[MeSH Terms])) OR ((assisted reproduction techniques) OR assisted reproduction techniques[Title/Abstract])) OR ((Infertile female) OR Infertile female[Title/Abstract])) OR (("female subfertility") OR "female subfertility"[Title/Abstract])) OR ((Infertile female) OR Infertile female[Title/Abstract])) OR ((subfertile female) OR subfertile female[Title/Abstract])) OR ((Polycystic Ovary Syndrome) OR Polycystic Ovary Syndrome[Title/Abstract])) OR ((PCOS) OR PCOS[Title/Abstract])) OR ((Endometriosis) OR Endometriosis[Title/Abstract])) OR (((unexplained and endometriosis related infertility)) OR (unexplained[Title/Abstract] AND endometriosis related infertility[Title/Abstract]))) OR ((unexplained infertility) OR unexplained infertility[Title/Abstract])) OR ((unexplained subfertility) OR unexplained subfertility[Title/Abstract]))) AND ((((((((((((N Acetyl L cysteine) OR N Acetyl L cysteine[Title/Abstract]) OR N Acetyl L cysteine[MeSH Terms])) OR (((N acetyl L-cysteine) OR N acetyl L-cysteine[Title/Abstract]) OR N acetyl L-cysteine[MeSH Terms])) OR ((N acetylcysteine) OR N acetylcysteine[Title/Abstract])) OR ((N-acetyl-cysteine) OR N-acetyl-cysteine[Title/Abstract])) OR ((N-acetylcysteine) OR N-acetylcysteine[Title/Abstract])) OR ((("Acetylcysteine"[Mesh]) OR "Acetylcysteine") OR "Acetylcysteine"[Title/Abstract]))) OR NAC) OR NAC[Title/Abstract])

**Cochrane search strategy**

| **ID** | **Search** | **Hits** |
| --- | --- | --- |
| #1 | N-Acetylcysteine | 1545 |
| #2 | (N-Acetylcysteine):ti,ab,kw | 1485 |
| #3 | MeSH descriptor: [Acetylcysteine] explode all trees | 963 |
| #4 | N-acetyl-cysteine | 419 |
| #5 | (N-acetyl-cysteine):ti,ab,kw | 383 |
| #6 | N acetylcysteine | 1839 |
| #7 | (N acetylcysteine):ti,ab,kw | 1756 |
| #8 | N acetyl L-cysteine | 86 |
| #9 | (N acetyl L-cysteine):ti,ab,kw | 67 |
| #10 | N Acetyl L cysteine | 190 |
| #11 | (N Acetyl L cysteine):ti,ab,kw | 120 |
| #12 | NAC | 1751 |
| #13 | (NAC):ti,ab,kw | 1628 |
| #14 | {OR #1-#13} | 2744 |
| #15 | IVF | 5714 |
| #16 | (IVF):ti,ab,kw | 5410 |
| #17 | ICSI | 2696 |
| #18 | (ICSI):ti,ab,kw | 2582 |
| #19 | MeSH descriptor: [Sperm Injections, Intracytoplasmic] explode all trees | 552 |
| #20 | in-vitro fertilisation | 4432 |
| #21 | (in-vitro fertilisation):ti,ab,kw | 4177 |
| #22 | in-vitro fertilisation procedure | 629 |
| #23 | (in-vitro fertilisation procedure):ti,ab,kw | 499 |
| #24 | in vitro fertilization | 4439 |
| #25 | (in vitro fertilization):ti,ab,kw | 4185 |
| #26 | MeSH descriptor: [Fertilization in Vitro] explode all trees | 2040 |
| #27 | intracytoplasmic sperm injection | 2007 |
| #28 | (intracytoplasmic sperm injection):ti,ab,kw | 1910 |
| #29 | MeSH descriptor: [Sperm Injections, Intracytoplasmic] explode all trees | 552 |
| #30 | intracytoplasmic morphologically selected sperm injection | 71 |
| #31 | (intracytoplasmic morphologically selected sperm injection):ti,ab,kw | 55 |
| #32 | superovulation | 247 |
| #33 | (superovulation):ti,ab,kw | 213 |
| #34 | MeSH descriptor: [Superovulation] explode all trees | 57 |
| #35 | superovulation induction | 105 |
| #36 | (superovulation induction):ti,ab,kw | 74 |
| #37 | IUI | 958 |
| #38 | (IUI):ti,ab,kw | 883 |
| #39 | insemination, intrauterine | 1123 |
| #40 | (insemination, intrauterine):ti,ab,kw | 1047 |
| #41 | Intrauterine Insemination | 1123 |
| #42 | (Intrauterine Insemination):ti,ab,kw | 1047 |
| #43 | artificial insemination | 602 |
| #44 | (artificial insemination):ti,ab,kw | 565 |
| #45 | MeSH descriptor: [Insemination, Artificial] explode all trees | 369 |
| #46 | assisted reproduction techniques | 454 |
| #47 | (assisted reproduction techniques):ti,ab,kw | 197 |
| #48 | Female subfertility | 627 |
| #49 | (Female subfertility):ti,ab,kw | 551 |
| #50 | MeSH descriptor: [Infertility, Female] explode all trees | 1342 |
| #51 | Polycystic Ovary Syndrome | 3056 |
| #52 | (Polycystic Ovary Syndrome):ti,ab,kw | 2967 |
| #53 | MeSH descriptor: [Polycystic Ovary Syndrome] explode all trees | 1344 |
| #54 | PCOS | 2709 |
| #55 | (PCOS):ti,ab,kw | 2653 |
| #56 | Endometriosis | 2323 |
| #57 | (Endometriosis):ti,ab,kw | 2201 |
| #58 | MeSH descriptor: [Endometriosis] explode all trees | 751 |
| #59 | Subfertility | 848 |
| #60 | (Subfertility):ti,ab,kw | 747 |
| #61 | unexplained and endometriosis related infertility | 163 |
| #62 | (unexplained and endometriosis related infertility):ti,ab,kw | 9 |
| #63 | unexplained infertility | 839 |
| #64 | (unexplained infertility):ti,ab,kw | 747 |
| #68 | #14 AND #67 in Trials | 67 |

**Embase**

| **No.** | **Query** | **Results** |
| --- | --- | --- |
| #33 | ('acetylcysteine'/exp OR acetylcysteine*:ta,ab,kw,ti OR (n AND acetylcysteine:ti,ta,ab,kw) OR (n* NEAR/1 acetylcysteine*):ti,ta,ab,kw) AND ('in vitro fertilization'/exp OR (in AND vitro AND fertilization:ta,ab,ti,kw) OR 'intracytoplasmic sperm injection'/exp OR ('in vitro' AND fertilisation:kw,ab,ta,ti) OR ivf:kw,ab,ta,ti OR icsi:ta,ab,kw,ti OR 'superovulation'/exp OR superovulation*:ta,ab,kw,ti OR iui:ta,ab,kw,ti OR 'infertility therapy'/exp OR 'intrauterine insemination'/exp OR (intrauterine AND ('insemination'/exp OR insemination)) OR 'artificial insemination'/exp OR (assisted AND ('reproduction'/exp OR reproduction) AND techniques:ta,ab,kw,ti) OR 'subfertility'/exp OR subfertility*:ta,kw,ab,ti OR subfertility*:ta,kw,ab,ti OR 'ovary cyst'/exp OR 'ovary polycystic disease':ta,ab,kw,ti OR 'polycystic ovary syndrome':ta,ab,kw,ti OR 'polycystic ovary disease':ta,ab,kw,ti OR 'polycystic ovarian disease':ta,ab,kw,ti OR 'polycystic ovarian syndrome':ta,ab,kw,ti OR pcos:ta,ab,kw,ti OR 'endometriosis'/exp OR (unexplained* NEAR/1 infertility*):ta,ab,kw,ti) | 221 |
| #32 | 'in vitro fertilization'/exp OR (in AND vitro AND fertilization:ta,ab,ti,kw) OR 'intracytoplasmic sperm injection'/exp OR ('in vitro' AND fertilisation:kw,ab,ta,ti) OR ivf:kw,ab,ta,ti OR icsi:ta,ab,kw,ti OR 'superovulation'/exp OR superovulation*:ta,ab,kw,ti OR iui:ta,ab,kw,ti OR 'infertility therapy'/exp OR 'intrauterine insemination'/exp OR (intrauterine AND ('insemination'/exp OR insemination)) OR 'artificial insemination'/exp OR (assisted AND ('reproduction'/exp OR reproduction) AND techniques:ta,ab,kw,ti) OR 'subfertility'/exp OR subfertility*:ta,kw,ab,ti OR subfertility*:ta,kw,ab,ti OR 'ovary cyst'/exp OR 'ovary polycystic disease':ta,ab,kw,ti OR 'polycystic ovary syndrome':ta,ab,kw,ti OR 'polycystic ovary disease':ta,ab,kw,ti OR 'polycystic ovarian disease':ta,ab,kw,ti OR 'polycystic ovarian syndrome':ta,ab,kw,ti OR pcos:ta,ab,kw,ti OR 'endometriosis'/exp OR (unexplained* NEAR/1 infertility*):ta,ab,kw,ti | 203342 |
| #31 | 'acetylcysteine'/exp OR acetylcysteine*:ta,ab,kw,ti OR (n AND acetylcysteine:ti,ta,ab,kw) OR (n* NEAR/1 acetylcysteine*):ti,ta,ab,kw | 36319 |
| #30 | (unexplained* NEAR/1 infertility*):ta,ab,kw,ti | 2972 |
| #29 | 'endometriosis'/exp | 36704 |
| #28 | pcos:ta,ab,kw,ti | 15955 |
| #27 | 'polycystic ovarian syndrome':ta,ab,kw,ti | 4281 |
| #26 | 'polycystic ovarian disease':ta,ab,kw,ti | 825 |
| #25 | 'polycystic ovary disease':ta,ab,kw,ti | 227 |
| #24 | 'polycystic ovary syndrome':ta,ab,kw,ti | 16236 |
| #23 | 'ovary polycystic disease':ta,ab,kw,ti | 5 |
| #22 | 'ovary cyst'/exp | 38316 |
| #21 | subfertility*:ta,kw,ab,ti | 4729 |
| #20 | subfertility*:ta,kw,ab,ti | 4729 |
| #19 | 'subfertility'/exp | 4723 |
| #18 | assisted AND ('reproduction'/exp OR reproduction) AND techniques:ta,ab,kw,ti | 5873 |
| #17 | 'artificial insemination'/exp | 19303 |
| #16 | intrauterine AND ('insemination'/exp OR insemination) | 5652 |
| #15 | 'intrauterine insemination'/exp | 4464 |
| #14 | 'infertility therapy'/exp | 115763 |
| #13 | iui:ta,ab,kw,ti | 3097 |
| #12 | superovulation*:ta,ab,kw,ti | 2564 |
| #11 | 'superovulation'/exp | 2839 |
| #10 | icsi:ta,ab,kw,ti | 15786 |
| #9 | ivf:kw,ab,ta,ti | 39550 |
| #8 | 'in vitro' AND fertilisation:kw,ab,ta,ti | 3424 |
| #7 | 'intracytoplasmic sperm injection'/exp | 19555 |
| #6 | in AND vitro AND fertilization:ta,ab,ti,kw | 36105 |
| #5 | 'in vitro fertilization'/exp | 88229 |
| #4 | (n* NEAR/1 acetylcysteine*):ti,ta,ab,kw | 15356 |
| #3 | n AND acetylcysteine:ti,ta,ab,kw | 14593 |
| #2 | acetylcysteine*:ta,ab,kw,ti | 15356 |
| #1 | 'acetylcysteine'/exp | 34441 |

**Ovid Search**

| 29 | 28 and 20 | 102 |
| --- | --- | --- |
| 28 | 22 or 23 or 24 or 25 or 26 or 27 | 31757 |
| 27 | NAC.mp. | 17838 |
| 26 | N Acetyl L cysteine.mp. | 4088 |
| 25 | N acetyl L-cysteine.mp. | 4088 |
| 24 | N acetylcysteine.mp. | 11078 |
| 23 | N-acetyl-cysteine.mp. | 3429 |
| 22 | N-Acetylcysteine.mp. or exp Acetylcysteine/ | 17779 |
| 21 | limit 20 to (humans and "adult (19 to 44 years)" and female) | 50132 |
| 20 | 1 or 2 or 3 or 4 or 5 or 6 or 7 or 8 or 9 or 10 or 1 1 or 12 or 13 or 14 or 15 or 16 or 17 or 18 or 19 | 159825 |
| 19 | exp Embryo Transfer/ | 15492 |
| 18 | (unexplained and endometriosis related infertility).mp. [mp=title, abstract, original title, name of substance word, subject heading word, floating sub-heading word, keyword heading word, organism supplementary concept word, protocol supplementary concept word, rare disease supplementary concept word, unique identifier, synonyms] | 6 |
| 17 | intracytoplasmic morphologically selected sperm injection.mp. | 87 |
| 16 | ICSI.mp. | 8057 |
| 15 | IVF .mp. or exp Ovulation Induction/ | 32016 |
| 14 | unexplained infertility .mp. | 1924 |
| 13 | Subfertility .mp. or exp Infertility/ | 65240 |
| 12 | Endometriosis.mp. or exp Endometriosis/ | 26486 |
| 11 | PCOS.mp. | 10321 |
| 10 | Polycystic Ovary Syndrome.mp. or exp Polycystic Ovary Syndrome/ | 16414 |
| 9 | Female subfertility .mp. or exp Infertility , Female/ | 27751 |
| 8 | assisted reproduction techniques.mp. or exp Reproductive T echniques, Assisted/ | 66908 |
| 7 | artificial insemination.mp. | 6423 |
| 6 | Intrauterine Insemination.mp. | 2369 |
| 5 | exp Insemination, Artificial/ or insemination, intrauterine.mp. | 11454 |
| 4 | superovulation induction.mp. | 52 |
| 3 | exp Superovulation/ | 1918 |
| 2 | exp Sperm Injections, Intracytoplasmic/ | 6286 |
| 1 | exp Fertilization in Vitro/ | 34407 |
